# Supplementary material
Source: Springer Nature journal article supplement (https://www.springermedizin.de/resource/supplementary/12891_2014_2232_MOESM1_ESM.pdf/9509736)

# Wrist fracture patients Informed Consent

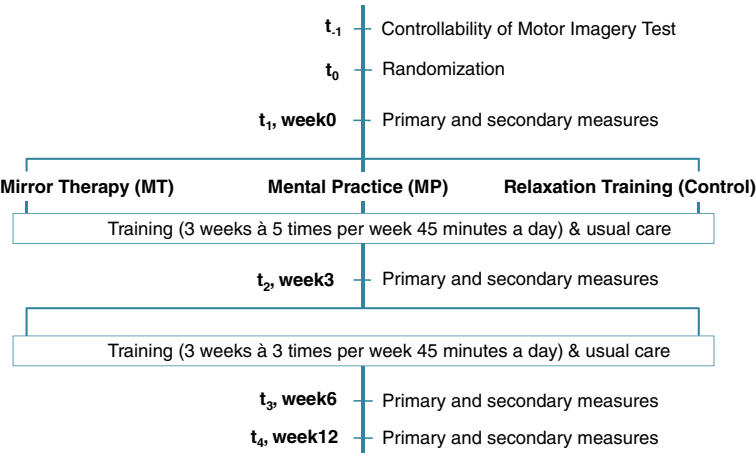

Supplement: MOESM1 [file 9509736]
